# Supplementary material for: First-row transition metal doped germanium clusters Ge16M: some remarkable superhalogens
Source: Royal Society of Chemistry journal article supplement (doi:10.1039/d1ra08527a), 2022-01-01
Supplement: d1ra08527a1.pdf [file d1ra08527a1.pdf]

## Supplementary Information

### **The first-row transition metal doped germanium clusters $\text{Ge}_{16}\text{M}$ : Some remarkable superhalogens**

**Huu Tho Nguyen,<sup>a</sup> Ngo Tuan Cuong,<sup>b</sup> Ngo Thi Lan,<sup>c,d</sup> Nguyen Thanh Tung,<sup>c</sup>  
Minh Tho Nguyen,<sup>e</sup> and Nguyen Minh Tam,<sup>f,g,\*</sup>**

<sup>a</sup> Faculty of Natural Sciences Education, Sai Gon University, 273 An Duong Vuong street, , Ho Chi Minh City, Vietnam

<sup>b</sup> Center for Computational Science and Faculty of Chemistry, Hanoi National University of Education, Hanoi, Vietnam

<sup>c</sup> Institute of Materials Science and Graduate University of Science and Technology, Vietnam Academy of Science and Technology, 18 Hoang Quoc Viet, Hanoi, Vietnam

<sup>d</sup> Institute of Science and Technology, TNU-University of Sciences, Tan Thinh Ward, Thai Nguyen City, Vietnam

<sup>e</sup> Institute for Computational Science and Technology (ICST), Quang Trung Software City, Ho Chi Minh City, Vietnam

<sup>f</sup> Laboratory of Theoretical and Computational Biophysics, Advanced Institute of Materials Science, Ton Duc Thang University, Ho Chi Minh City, Vietnam. Email: [nguyenminhtam@tdtu.edu.vn](mailto:nguyenminhtam@tdtu.edu.vn)

<sup>g</sup> Faculty of Pharmacy, Ton Duc Thang University, Ho Chi Minh City, Vietnam

**Table S1.** Cartesian coordinates of the most stable isomers of Ge<sub>16</sub>M at both neutral and anionic states

| Cluster                                       | Atom number | Element | Cartesian Coordinates |             |             |
|-----------------------------------------------|-------------|---------|-----------------------|-------------|-------------|
| <b>Ge<sub>16</sub>Sc</b><br>neutral           | 1           | Ge      | 0.00000000            | 1.53274500  | -2.63169500 |
|                                               | 2           | Ge      | -1.32739600           | -0.76637200 | -2.63169500 |
|                                               | 3           | Ge      | 0.00000000            | -2.68331300 | -0.94784200 |
|                                               | 4           | Ge      | -1.29485800           | -2.28817900 | 1.59878100  |
|                                               | 5           | Ge      | 0.00000000            | 0.00000000  | 2.74986000  |
|                                               | 6           | Ge      | 1.33419200            | 2.26547000  | 1.59878100  |
|                                               | 7           | Ge      | 0.00000000            | 2.94711500  | -0.53685100 |
|                                               | 8           | Ge      | 1.32739600            | -0.76637200 | -2.63169500 |
|                                               | 9           | Ge      | 2.32381800            | 1.34165700  | -0.94784200 |
|                                               | 10          | Ge      | 2.62905100            | 0.02271000  | 1.59878100  |
|                                               | 11          | Ge      | 1.29485800            | -2.28817900 | 1.59878100  |
|                                               | 12          | Ge      | -1.33419200           | 2.26547000  | 1.59878100  |
|                                               | 13          | Ge      | -2.55227700           | -1.47355800 | -0.53685100 |
|                                               | 14          | Ge      | -2.62905100           | 0.02271000  | 1.59878100  |
|                                               | 15          | Ge      | -2.32381800           | 1.34165700  | -0.94784200 |
|                                               | 16          | Ge      | 2.55227700            | -1.47355800 | -0.53685100 |
|                                               | 17          | Sc      | 0.00000000            | 0.00000000  | 0.01008700  |
| <b>Ge<sub>16</sub>Sc<sup>-</sup></b><br>anion | 1           | Ge      | 0.90194700            | -0.90194700 | 2.75513800  |
|                                               | 2           | Ge      | -0.90194700           | 0.90194700  | 2.75513800  |
|                                               | 3           | Ge      | -0.90194700           | 2.75513800  | 0.90194700  |
|                                               | 4           | Ge      | 0.90194700            | 2.75513800  | -0.90194700 |
|                                               | 5           | Ge      | -2.75513800           | -0.90194700 | -0.90194700 |
|                                               | 6           | Ge      | -2.75513800           | 0.90194700  | 0.90194700  |
|                                               | 7           | Ge      | 2.75513800            | -0.90194700 | 0.90194700  |
|                                               | 8           | Ge      | 2.75513800            | 0.90194700  | -0.90194700 |
|                                               | 9           | Ge      | -0.90194700           | -0.90194700 | -2.75513800 |
|                                               | 10          | Ge      | 0.90194700            | 0.90194700  | -2.75513800 |
|                                               | 11          | Ge      | 0.90194700            | -2.75513800 | 0.90194700  |
|                                               | 12          | Ge      | -0.90194700           | -2.75513800 | -0.90194700 |
|                                               | 13          | Ge      | -1.63773500           | -1.63773500 | 1.63773500  |
|                                               | 14          | Ge      | 1.63773500            | 1.63773500  | 1.63773500  |
|                                               | 15          | Ge      | 1.63773500            | -1.63773500 | -1.63773500 |
|                                               | 16          | Ge      | -1.63773500           | 1.63773500  | -1.63773500 |
|                                               | 17          | Sc      | 0.00000000            | 0.00000000  | 0.00000000  |

|                                     |    |    |             |             |             |
|-------------------------------------|----|----|-------------|-------------|-------------|
| <b>Ge<sub>16</sub>Ti</b><br>neutral | 1  | Ge | 0.89497100  | -0.89497100 | 2.73165100  |
|                                     | 2  | Ge | -0.89497100 | 0.89497100  | 2.73165100  |
|                                     | 3  | Ge | -0.89497100 | 2.73165100  | 0.89497100  |
|                                     | 4  | Ge | 0.89497100  | 2.73165100  | -0.89497100 |
|                                     | 5  | Ge | -2.73165100 | -0.89497100 | -0.89497100 |
|                                     | 6  | Ge | -2.73165100 | 0.89497100  | 0.89497100  |
|                                     | 7  | Ge | 2.73165100  | -0.89497100 | 0.89497100  |
|                                     | 8  | Ge | 2.73165100  | 0.89497100  | -0.89497100 |
|                                     | 9  | Ge | -0.89497100 | -0.89497100 | -2.73165100 |
|                                     | 10 | Ge | 0.89497100  | 0.89497100  | -2.73165100 |
|                                     | 11 | Ge | 0.89497100  | -2.73165100 | 0.89497100  |
|                                     | 12 | Ge | -0.89497100 | -2.73165100 | -0.89497100 |
|                                     | 13 | Ge | -1.58811600 | -1.58811600 | 1.58811600  |
|                                     | 14 | Ge | 1.58811600  | 1.58811600  | 1.58811600  |
|                                     | 15 | Ge | 1.58811600  | -1.58811600 | -1.58811600 |
|                                     | 16 | Ge | -1.58811600 | 1.58811600  | -1.58811600 |
|                                     | 17 | Ti | 0.00000000  | 0.00000000  | 0.00000000  |
| <b>Ge<sub>16</sub>Ti</b><br>anion   | 1  | Ge | -1.28722700 | -0.74318100 | -2.63887800 |
|                                     | 2  | Ge | 2.26478500  | 1.30757400  | -0.88949500 |
|                                     | 3  | Ge | 1.28722700  | -0.74318100 | -2.63887800 |
|                                     | 4  | Ge | 0.00000000  | 1.48636200  | -2.63887800 |
|                                     | 5  | Ge | 0.00000000  | 2.97932700  | -0.56219800 |
|                                     | 6  | Ge | -2.26478500 | 1.30757400  | -0.88949500 |
|                                     | 7  | Ge | -1.31072900 | 2.21986400  | 1.58439300  |
|                                     | 8  | Ge | -2.57782300 | 0.02519300  | 1.58439300  |
|                                     | 9  | Ge | 1.31072900  | 2.21986400  | 1.58439300  |
|                                     | 10 | Ge | 0.00000000  | 0.00000000  | 2.75227700  |
|                                     | 11 | Ge | 1.26709400  | -2.24505700 | 1.58439300  |
|                                     | 12 | Ge | 2.57782300  | 0.02519300  | 1.58439300  |
|                                     | 13 | Ge | -2.58017300 | -1.48966400 | -0.56219800 |
|                                     | 14 | Ge | 0.00000000  | -2.61514800 | -0.88949500 |
|                                     | 15 | Ge | -1.26709400 | -2.24505700 | 1.58439300  |
|                                     | 16 | Ge | 2.58017300  | -1.48966400 | -0.56219800 |
|                                     | 17 | Ti | 0.00000000  | 0.00000000  | 0.01902600  |

|                                              |    |    |             |             |             |
|----------------------------------------------|----|----|-------------|-------------|-------------|
| <b>Ge<sub>16</sub>V</b><br>neutral           | 1  | Ge | -0.88887700 | 2.49087000  | -1.60784600 |
|                                              | 2  | Ge | 1.63313100  | -1.16921000 | -2.20621400 |
|                                              | 3  | Ge | 1.74778700  | -1.01253900 | 2.19552000  |
|                                              | 4  | Ge | -1.10058700 | 2.12283600  | 1.19630400  |
|                                              | 5  | Ge | 1.45882900  | 1.54856500  | 2.09265400  |
|                                              | 6  | Ge | 1.26589200  | 2.69759400  | -0.12855200 |
|                                              | 7  | Ge | 2.79069300  | 0.31080200  | -0.08383500 |
|                                              | 8  | Ge | 1.35121400  | 1.32139600  | -2.30779000 |
|                                              | 9  | Ge | -2.46533800 | -1.60641100 | -0.61589400 |
|                                              | 10 | Ge | -0.29914600 | -2.74572800 | -1.39631300 |
|                                              | 11 | Ge | -0.61261700 | -2.21176800 | 1.37363800  |
|                                              | 12 | Ge | -2.55615200 | -0.22256300 | 1.56927000  |
|                                              | 13 | Ge | -0.48068100 | 0.06952600  | 3.05412800  |
|                                              | 14 | Ge | -2.75576400 | 0.96376800  | -0.72217200 |
|                                              | 15 | Ge | 1.83354000  | -2.35177900 | 0.07685300  |
|                                              | 16 | Ge | -0.95176400 | -0.20857900 | -2.48919800 |
|                                              | 17 | V  | 0.04151400  | 0.00448000  | -0.00077100 |
| <b>Ge<sub>16</sub>V<sup>-</sup></b><br>anion | 1  | Ge | 0.01092300  | -0.05868700 | -2.66016100 |
|                                              | 2  | Ge | -0.53036600 | -2.55424400 | 0.98395800  |
|                                              | 3  | Ge | 0.81890400  | -2.50568500 | -1.54713900 |
|                                              | 4  | Ge | 2.17376400  | -1.91656100 | 0.58153700  |
|                                              | 5  | Ge | 1.13051200  | -0.95191000 | 2.65156800  |
|                                              | 6  | Ge | 2.49001600  | 0.85222300  | 0.92098000  |
|                                              | 7  | Ge | 0.58022600  | 2.86007800  | 0.46953600  |
|                                              | 8  | Ge | -0.82746400 | 2.42551100  | -1.66145600 |
|                                              | 9  | Ge | 0.29422200  | 1.55157300  | 2.59305700  |
|                                              | 10 | Ge | -1.97109400 | 1.76339600  | 0.88300300  |
|                                              | 11 | Ge | -2.54058700 | 0.49609400  | -1.62715900 |
|                                              | 12 | Ge | -2.76073600 | -0.90864300 | 0.53953100  |
|                                              | 13 | Ge | 1.74042000  | 1.90297300  | -1.64081500 |
|                                              | 14 | Ge | -1.70895600 | -1.98811800 | -1.56740700 |
|                                              | 15 | Ge | -1.45617200 | -0.42470800 | 2.62925900  |
|                                              | 16 | Ge | 2.55653000  | -0.54418100 | -1.58242600 |
|                                              | 17 | V  | -0.00019900 | 0.00123800  | 0.04749100  |

|                                               |    |    |             |             |             |
|-----------------------------------------------|----|----|-------------|-------------|-------------|
| <b>Ge<sub>16</sub>Cr</b><br>neutral           | 1  | Ge | -3.18524400 | -0.02453000 | 0.00000000  |
|                                               | 2  | Ge | 1.79598300  | -1.54145700 | 2.69206200  |
|                                               | 3  | Ge | 2.05213300  | -1.54128700 | 0.00000000  |
|                                               | 4  | Ge | -0.21248200 | -2.50302900 | -1.24999600 |
|                                               | 5  | Ge | -2.18324100 | -1.14317000 | -1.95206700 |
|                                               | 6  | Ge | -0.24781400 | 2.33033000  | -1.54108400 |
|                                               | 7  | Ge | -0.24781400 | 2.33033000  | 1.54108400  |
|                                               | 8  | Ge | 2.03694500  | 0.79556400  | 1.34923200  |
|                                               | 9  | Ge | -0.21248200 | -2.50302900 | 1.24999600  |
|                                               | 10 | Ge | -0.23166700 | 0.16563900  | 2.79119700  |
|                                               | 11 | Ge | -2.20864100 | 2.23684100  | 0.00000000  |
|                                               | 12 | Ge | -2.18324100 | -1.14317000 | 1.95206700  |
|                                               | 13 | Ge | 1.75926500  | 3.12409500  | 0.00000000  |
|                                               | 14 | Ge | 1.79598300  | -1.54145700 | -2.69206200 |
|                                               | 15 | Ge | -0.23166700 | 0.16563900  | -2.79119700 |
|                                               | 16 | Ge | 2.03694500  | 0.79556400  | -1.34923200 |
|                                               | 17 | Cr | -0.44394900 | -0.00383300 | 0.00000000  |
| <b>Ge<sub>16</sub>Cr<sup>-</sup></b><br>anion | 1  | Ge | -2.09091200 | -0.12886300 | 1.55069000  |
|                                               | 2  | Ge | -1.81448000 | 0.27493100  | -3.08512300 |
|                                               | 3  | Ge | -1.77444000 | 2.55341000  | 1.79290100  |
|                                               | 4  | Ge | -1.79065600 | -2.81382400 | 1.32716600  |
|                                               | 5  | Ge | -2.10071900 | 1.40252000  | -0.63812800 |
|                                               | 6  | Ge | -2.11213500 | -1.25826100 | -0.86936200 |
|                                               | 7  | Ge | 0.21048500  | -2.76702900 | -0.39297900 |
|                                               | 8  | Ge | 0.22924800  | 2.79384800  | 0.09113700  |
|                                               | 9  | Ge | 0.19811700  | -1.31726900 | -2.46772800 |
|                                               | 10 | Ge | 0.23272400  | -1.47801800 | 2.37173200  |
|                                               | 11 | Ge | 0.20991200  | 1.72183100  | -2.20232100 |
|                                               | 12 | Ge | 0.24021600  | 1.04421400  | 2.59111000  |
|                                               | 13 | Ge | 2.17038900  | -1.89566600 | 0.86793600  |
|                                               | 14 | Ge | 2.18180000  | 1.70390500  | 1.18186600  |
|                                               | 15 | Ge | 2.15404800  | 0.17397400  | -2.09245100 |
|                                               | 16 | Ge | 3.59832900  | -0.00911800 | -0.02512600 |
|                                               | 17 | Cr | 0.34409800  | -0.00077900 | -0.00176100 |

|                                               |    |    |             |             |             |
|-----------------------------------------------|----|----|-------------|-------------|-------------|
| <b>Ge<sub>16</sub>Mn</b><br>neutral           | 1  | Ge | -1.68530427 | -1.96119541 | 1.27433801  |
|                                               | 2  | Ge | -2.21129906 | 0.45566004  | -1.68414802 |
|                                               | 3  | Ge | -1.68530427 | -1.96119541 | -1.27433801 |
|                                               | 4  | Ge | -2.21129906 | 0.45566004  | 1.68414802  |
|                                               | 5  | Ge | -0.44163707 | 2.49520225  | 0.00000000  |
|                                               | 6  | Ge | -0.05419419 | 0.22268686  | 2.87552292  |
|                                               | 7  | Ge | 1.54170390  | 1.60460839  | 1.57038175  |
|                                               | 8  | Ge | 2.30581214  | -0.82530186 | 1.28470289  |
|                                               | 9  | Ge | 1.54170390  | 1.60460839  | -1.57038175 |
|                                               | 10 | Ge | 2.30581214  | -0.82530186 | -1.28470289 |
|                                               | 11 | Ge | 0.69626404  | -2.68828117 | 0.00000000  |
|                                               | 12 | Ge | 0.58580936  | -2.33042790 | -2.65527801 |
|                                               | 13 | Ge | 0.58580936  | -2.33042790 | 2.65527801  |
|                                               | 14 | Ge | -0.05419419 | 0.22268686  | -2.87552292 |
|                                               | 15 | Ge | -2.90578517 | 2.23373215  | 0.00000000  |
|                                               | 16 | Ge | 1.77292335  | 3.65470744  | 0.00000000  |
|                                               | 17 | Mn | -0.11087399 | -0.03497387 | 0.00000000  |
| <b>Ge<sub>16</sub>Mn<sup>-</sup></b><br>anion | 1  | Ge | -1.84041300 | 2.58001800  | 0.00000000  |
|                                               | 2  | Ge | -2.63470600 | -2.47712700 | 0.00000000  |
|                                               | 3  | Ge | -1.38649000 | 1.61113800  | 2.28427100  |
|                                               | 4  | Ge | -1.38649000 | 1.61113800  | -2.28427100 |
|                                               | 5  | Ge | -1.19256900 | -0.89156100 | -1.36829200 |
|                                               | 6  | Ge | 0.82079800  | 2.80648900  | -1.50440000 |
|                                               | 7  | Ge | 2.69376400  | 1.85041800  | 0.00000000  |
|                                               | 8  | Ge | 1.85163700  | -3.28196100 | 0.00000000  |
|                                               | 9  | Ge | 2.09894200  | -0.65168400 | 0.00000000  |
|                                               | 10 | Ge | 0.82079800  | 2.80648900  | 1.50440000  |
|                                               | 11 | Ge | 1.18339400  | -1.61741900 | 2.18211800  |
|                                               | 12 | Ge | -0.21029000 | 4.59558100  | 0.00000000  |
|                                               | 13 | Ge | -0.44665300 | -3.52068100 | 1.36749800  |
|                                               | 14 | Ge | -0.44665300 | -3.52068100 | -1.36749800 |
|                                               | 15 | Ge | 1.18339400  | -1.61741900 | -2.18211800 |
|                                               | 16 | Ge | -1.19256900 | -0.89156100 | 1.36829200  |
|                                               | 17 | Mn | 0.10765400  | 0.77929000  | 0.00000000  |

|                                               |    |    |             |             |             |
|-----------------------------------------------|----|----|-------------|-------------|-------------|
| <b>Ge<sub>16</sub>Fe</b><br>neutral           | 1  | Ge | -1.44171500 | -1.27553900 | 2.07884000  |
|                                               | 2  | Ge | 1.08587500  | 1.50416300  | 1.91940700  |
|                                               | 3  | Ge | -1.43956600 | 1.27213800  | 2.08118600  |
|                                               | 4  | Ge | 1.08352000  | -1.50801900 | 1.91625200  |
|                                               | 5  | Ge | 2.40570300  | -0.00114800 | 0.00060400  |
|                                               | 6  | Ge | 0.24522300  | -2.82754500 | -0.00251300 |
|                                               | 7  | Ge | 1.08537300  | -1.50477800 | -1.91862300 |
|                                               | 8  | Ge | -1.44007100 | -1.27051800 | -2.08192100 |
|                                               | 9  | Ge | 1.08681000  | 1.50700100  | -1.91596600 |
|                                               | 10 | Ge | -1.43872900 | 1.27715500  | -2.07961500 |
|                                               | 11 | Ge | -2.82135800 | 0.00132900  | -0.00066400 |
|                                               | 12 | Ge | -2.37615900 | 2.63560300  | 0.00226400  |
|                                               | 13 | Ge | -2.37920200 | -2.63408900 | -0.00348900 |
|                                               | 14 | Ge | 0.24853400  | 2.82746700  | 0.00256200  |
|                                               | 15 | Ge | 3.10272600  | -0.00417500 | 2.41383400  |
|                                               | 16 | Ge | 3.10469400  | 0.00064800  | -2.41202200 |
|                                               | 17 | Fe | -0.13742700 | 0.00037700  | -0.00016600 |
| <b>Ge<sub>16</sub>Fe<sup>-</sup></b><br>anion | 1  | Ge | 2.65183100  | -1.68389000 | 0.75955300  |
|                                               | 2  | Ge | -1.92022100 | -2.33346800 | 1.08397700  |
|                                               | 3  | Ge | 1.67005400  | -2.19246800 | -1.57745300 |
|                                               | 4  | Ge | 1.66548800  | -0.26132800 | 2.68451400  |
|                                               | 5  | Ge | -0.72752200 | -0.16156000 | 1.78263300  |
|                                               | 6  | Ge | 2.66717300  | 1.50093300  | 1.07032000  |
|                                               | 7  | Ge | 1.67033100  | 2.46209500  | -1.12013600 |
|                                               | 8  | Ge | -3.43330000 | 1.41712200  | -0.66265900 |
|                                               | 9  | Ge | -0.73150700 | 1.64522000  | -0.74671600 |
|                                               | 10 | Ge | 2.69250200  | 0.18092900  | -1.82455600 |
|                                               | 11 | Ge | -1.89525900 | 0.22989800  | -2.55543100 |
|                                               | 12 | Ge | 4.41767800  | -0.01038500 | 0.02480100  |
|                                               | 13 | Ge | -3.43278900 | -1.27019300 | -0.90812700 |
|                                               | 14 | Ge | -3.44207000 | -0.14237100 | 1.54446000  |
|                                               | 15 | Ge | -1.92002000 | 2.09782000  | 1.48567700  |
|                                               | 16 | Ge | -0.72764700 | -1.48609700 | -1.02694100 |
|                                               | 17 | Fe | 0.97880200  | 0.00952900  | -0.01712700 |

|                                               |    |    |             |             |             |
|-----------------------------------------------|----|----|-------------|-------------|-------------|
| <b>Ge<sub>16</sub>Co</b><br>neutral           | 1  | Ge | -1.29886700 | 1.39071300  | -2.07456900 |
|                                               | 2  | Ge | 0.90538500  | -1.56791700 | -1.88681500 |
|                                               | 3  | Ge | -1.58358300 | -1.13693600 | -2.03734000 |
|                                               | 4  | Ge | 1.23320400  | 1.40433400  | -1.96587900 |
|                                               | 5  | Ge | 2.39213500  | -0.18205900 | 0.00000200  |
|                                               | 6  | Ge | 0.57532600  | 2.75905300  | -0.00006800 |
|                                               | 7  | Ge | 1.23320500  | 1.40443200  | 1.96581200  |
|                                               | 8  | Ge | -1.29886100 | 1.39080300  | 2.07451000  |
|                                               | 9  | Ge | 0.90538800  | -1.56782200 | 1.88689200  |
|                                               | 10 | Ge | -1.58358300 | -1.13684700 | 2.03738600  |
|                                               | 11 | Ge | -2.78032200 | 0.23972300  | -0.00000200 |
|                                               | 12 | Ge | -2.66933200 | -2.48085500 | 0.00005000  |
|                                               | 13 | Ge | -2.03102800 | 2.86453800  | -0.00006000 |
|                                               | 14 | Ge | -0.05888200 | -2.83043100 | 0.00006900  |
|                                               | 15 | Ge | 3.07434900  | -0.33451500 | -2.40090300 |
|                                               | 16 | Ge | 3.07435200  | -0.33439300 | 2.40091200  |
|                                               | 17 | Co | -0.10534600 | 0.14006300  | 0.00000200  |
| <b>Ge<sub>16</sub>Co<sup>-</sup></b><br>anion | 1  | Ge | 2.62154600  | -1.82771000 | 0.00400100  |
|                                               | 2  | Ge | -2.00658300 | -2.59598400 | 0.00561900  |
|                                               | 3  | Ge | 1.62428100  | -1.35756900 | -2.30261300 |
|                                               | 4  | Ge | 1.62464300  | -1.34717200 | 2.30866600  |
|                                               | 5  | Ge | -0.73147100 | -0.86811800 | 1.43613300  |
|                                               | 6  | Ge | 2.72991500  | 0.88277400  | 1.60042700  |
|                                               | 7  | Ge | 1.69604200  | 2.66357100  | -0.00603400 |
|                                               | 8  | Ge | -3.41367200 | 1.59945800  | -0.00352100 |
|                                               | 9  | Ge | -0.74447100 | 1.79512500  | -0.00380200 |
|                                               | 10 | Ge | 2.72969700  | 0.87535900  | -1.60442700 |
|                                               | 11 | Ge | -1.93793100 | 1.27226100  | -2.24289300 |
|                                               | 12 | Ge | 4.46489000  | -0.05763400 | -0.00001800 |
|                                               | 13 | Ge | -3.43179900 | -0.77319700 | -1.36243700 |
|                                               | 14 | Ge | -3.43185500 | -0.76722100 | 1.36554000  |
|                                               | 15 | Ge | -1.93812100 | 1.28205100  | 2.23748000  |
|                                               | 16 | Ge | -0.73143000 | -0.87445900 | -1.43201600 |
|                                               | 17 | Co | 1.03859900  | 0.11669900  | -0.00012400 |



|                                               |    |    |             |             |             |
|-----------------------------------------------|----|----|-------------|-------------|-------------|
| <b>Ge<sub>16</sub>Ni</b><br>neutral           | 1  | Ge | 2.14227000  | 1.07358500  | 1.08730100  |
|                                               | 2  | Ge | 1.79100800  | -2.18846100 | -2.20826800 |
|                                               | 3  | Ge | 1.79067500  | -0.82133900 | 2.99794900  |
|                                               | 4  | Ge | 1.79899700  | 3.00268700  | -0.78922000 |
|                                               | 5  | Ge | 2.13730800  | -1.48284400 | 0.38922500  |
|                                               | 6  | Ge | 2.14199600  | 0.39938800  | -1.47372100 |
|                                               | 7  | Ge | -0.21295900 | 1.84487100  | -2.03675800 |
|                                               | 8  | Ge | -0.22096600 | -2.05557100 | 1.82410500  |
|                                               | 9  | Ge | -0.21713200 | -0.55078100 | -2.69097600 |
|                                               | 10 | Ge | -0.21258900 | 2.60884100  | 0.86824700  |
|                                               | 11 | Ge | -0.22051600 | -2.68641000 | -0.57846600 |
|                                               | 12 | Ge | -0.21702300 | 0.84247600  | 2.61453700  |
|                                               | 13 | Ge | -2.13250100 | 1.65130000  | -0.43281000 |
|                                               | 14 | Ge | -2.13777600 | -0.44708300 | 1.64296900  |
|                                               | 15 | Ge | -2.13738300 | -1.19645100 | -1.21216000 |
|                                               | 16 | Ge | -4.00166900 | 0.00629400  | -0.00249600 |
|                                               | 17 | Ni | -0.10484500 | -0.00057400 | 0.00061700  |
| <b>Ge<sub>16</sub>Ni<sup>-</sup></b><br>anion | 1  | Ge | -2.62662500 | -1.53963400 | 0.89052400  |
|                                               | 2  | Ge | 2.22133500  | -2.23598300 | 1.34607200  |
|                                               | 3  | Ge | -1.46004300 | 0.00017200  | 2.52055300  |
|                                               | 4  | Ge | -1.71506200 | -2.32270700 | -1.30595900 |
|                                               | 5  | Ge | 0.69266100  | -1.77221500 | -0.60962500 |
|                                               | 6  | Ge | -2.85353800 | -0.00017100 | -1.57469500 |
|                                               | 7  | Ge | -1.71508600 | 2.32246300  | -1.30624800 |
|                                               | 8  | Ge | 3.28523300  | 1.36753800  | -1.07502200 |
|                                               | 9  | Ge | 0.69313400  | 1.77164600  | -0.61088400 |
|                                               | 10 | Ge | -2.62637100 | 1.53985500  | 0.89033300  |
|                                               | 11 | Ge | 2.22163700  | 2.23686800  | 1.34467200  |
|                                               | 12 | Ge | -4.59063900 | 0.00033500  | 0.31868900  |
|                                               | 13 | Ge | 3.62476300  | 0.00023700  | 1.24157800  |
|                                               | 14 | Ge | 3.28485400  | -1.36839600 | -1.07429700 |
|                                               | 15 | Ge | 1.36794400  | -0.00083500 | -2.42121700 |
|                                               | 16 | Ge | 0.89102500  | 0.00076400  | 1.61375500  |
|                                               | 17 | Ni | -0.79454200 | 0.00007500  | -0.21511800 |

|                                               |    |    |             |             |             |
|-----------------------------------------------|----|----|-------------|-------------|-------------|
| <b>Ge<sub>16</sub>Cu</b><br>neutral           | 1  | Ge | 2.70326600  | 1.50864000  | 1.09806300  |
|                                               | 2  | Ge | -1.95653200 | 2.11248600  | 1.53555700  |
|                                               | 3  | Ge | 1.63175300  | -0.27989500 | 2.64057900  |
|                                               | 4  | Ge | 1.63133300  | 2.42694900  | -1.07800400 |
|                                               | 5  | Ge | -0.75682000 | 1.57753200  | -0.70168200 |
|                                               | 6  | Ge | 2.70279400  | 0.19701500  | -1.85460200 |
|                                               | 7  | Ge | 1.63197400  | -2.14718100 | -1.56277100 |
|                                               | 8  | Ge | -3.40581000 | -1.28930900 | -0.93722300 |
|                                               | 9  | Ge | -0.75645000 | -1.39703600 | -1.01447300 |
|                                               | 10 | Ge | 2.70356400  | -1.70510800 | 0.75709300  |
|                                               | 11 | Ge | -1.95613400 | -2.38595100 | 1.06245100  |
|                                               | 12 | Ge | 4.40027300  | 0.00032300  | -0.00019100 |
|                                               | 13 | Ge | -3.40725100 | -0.16650600 | 1.58366100  |
|                                               | 14 | Ge | -3.40623100 | 1.45598100  | -0.64925100 |
|                                               | 15 | Ge | -1.95452300 | 0.27288900  | -2.59714200 |
|                                               | 16 | Ge | -0.75764700 | -0.18068100 | 1.71765200  |
|                                               | 17 | Cu | 1.05097100  | -0.00016500 | 0.00031200  |
| <b>Ge<sub>16</sub>Cu<sup>-</sup></b><br>anion | 1  | Ge | 2.75962100  | -1.75020800 | 0.04241100  |
|                                               | 2  | Ge | -2.02141200 | -2.58808200 | 0.06238300  |
|                                               | 3  | Ge | 1.67309000  | -1.37988100 | -2.25223700 |
|                                               | 4  | Ge | 1.67299900  | -1.26866000 | 2.31628300  |
|                                               | 5  | Ge | -0.78927900 | -0.83291400 | 1.50269800  |
|                                               | 6  | Ge | 2.76336500  | 0.90784900  | 1.50214300  |
|                                               | 7  | Ge | 1.68653400  | 2.63658000  | -0.06433000 |
|                                               | 8  | Ge | -3.46635300 | 1.58905200  | -0.03824900 |
|                                               | 9  | Ge | -0.78552700 | 1.73453400  | -0.04107400 |
|                                               | 10 | Ge | 2.76408800  | 0.83346000  | -1.54412300 |
|                                               | 11 | Ge | -2.00358800 | 1.23685600  | -2.26834400 |
|                                               | 12 | Ge | 4.62598100  | -0.00327400 | 0.00041900  |
|                                               | 13 | Ge | -3.47171000 | -0.81699800 | -1.35245900 |
|                                               | 14 | Ge | -3.47231500 | -0.75094700 | 1.38838100  |
|                                               | 15 | Ge | -2.00416100 | 1.34342000  | 2.20756500  |
|                                               | 16 | Ge | -0.78890000 | -0.90388300 | -1.46094100 |
|                                               | 17 | Cu | 0.94628100  | 0.01445000  | -0.00058100 |

|                                               |    |    |             |             |             |
|-----------------------------------------------|----|----|-------------|-------------|-------------|
| <b>Ge<sub>16</sub>Zn</b><br>neutral           | 1  | Ge | 2.82325100  | -1.76769300 | 0.18133000  |
|                                               | 2  | Ge | -2.04498000 | -2.59711800 | 0.26549100  |
|                                               | 3  | Ge | 1.69692100  | -1.54840100 | -2.13573700 |
|                                               | 4  | Ge | 1.69686000  | -1.08220600 | 2.40510200  |
|                                               | 5  | Ge | -0.84607700 | -0.72479200 | 1.59216400  |
|                                               | 6  | Ge | 2.82294900  | 1.03928900  | 1.44598700  |
|                                               | 7  | Ge | 1.70549100  | 2.62176900  | -0.26922600 |
|                                               | 8  | Ge | -3.49774600 | 1.58426500  | -0.16225400 |
|                                               | 9  | Ge | -0.84282700 | 1.75141900  | -0.17746000 |
|                                               | 10 | Ge | 2.82310500  | 0.72299100  | -1.62616400 |
|                                               | 11 | Ge | -2.02666900 | 1.06540000  | -2.37929400 |
|                                               | 12 | Ge | 4.67044800  | -0.00046700 | 0.00059500  |
|                                               | 13 | Ge | -3.50261600 | -0.92138600 | -1.28884700 |
|                                               | 14 | Ge | -3.50442600 | -0.64236500 | 1.44527600  |
|                                               | 15 | Ge | -2.02985800 | 1.52456100  | 2.11541400  |
|                                               | 16 | Ge | -0.84490100 | -1.03234600 | -1.41152600 |
|                                               | 17 | Zn | 0.96114400  | 0.00755000  | -0.00090800 |
| <b>Ge<sub>16</sub>Zn<sup>-</sup></b><br>anion | 1  | Ge | 2.90746800  | 0.71336000  | -1.60505000 |
|                                               | 2  | Ge | -2.07794600 | 1.04216600  | -2.34153400 |
|                                               | 3  | Ge | 1.70487800  | 2.59030300  | -0.27291000 |
|                                               | 4  | Ge | 1.70431300  | -1.53253500 | -2.10626300 |
|                                               | 5  | Ge | -0.84241100 | -1.01700000 | -1.39786300 |
|                                               | 6  | Ge | 2.90790100  | -1.74609700 | 0.18456600  |
|                                               | 7  | Ge | 1.70452500  | -1.05802900 | 2.38033000  |
|                                               | 8  | Ge | -3.60257500 | -0.63083700 | 1.41695100  |
|                                               | 9  | Ge | -0.84124500 | -0.70277600 | 1.57833500  |
|                                               | 10 | Ge | 2.90811600  | 1.03275300  | 1.41983500  |
|                                               | 11 | Ge | -2.07740600 | 1.50646200  | 2.07348200  |
|                                               | 12 | Ge | 4.78943700  | -0.00005300 | -0.00072700 |
|                                               | 13 | Ge | -3.60316200 | 1.54232500  | -0.16211800 |
|                                               | 14 | Ge | -3.60363900 | -0.91082600 | -1.25455800 |
|                                               | 15 | Ge | -2.07811200 | -2.54895300 | 0.26873000  |
|                                               | 16 | Ge | -0.84206600 | 1.71968200  | -0.18096100 |
|                                               | 17 | Zn | 1.00471700  | 0.00005800  | -0.00026200 |
